# Supplementary material
Source: publisher figshare collection journal article supplement (https://gsajournals.figshare.com/ndownloader/files/14394614)
Supplement: Supplementary file 1 [file 14394614]

## Sheet: Anopheles v22
Dataset S1. Master List of Anopheles gambiae miRNAs (numerical order)
Anopheles list
miRNA name	5p	3p	genome local	intragenic miRNA
bantam	ccggttttcattttcgatctga	tgagatcactttgaaagctg	chr2R: 33274498-33274608 [+]
let-7	tgaggtagttggttgtatagt	ctatacaatccgctaacttacc	chr3R: 10270708-10270797 [-]
miR-1	ccatgcttccttgcattcaata	tggaatgtaaagaagtatggag	chr3R: 10569154-10569251 [-]
miR-2b	tctcaaagtggctgtgaaatg	tatcacagccagctttgaaga	chr2L: 37757412-37757490 [-]	AGAP029116
miR-2-1	tcatcaaacttggttgttgta	tatcacagccagctttgatg	chr2L: 37758699-37758796 [-]	AGAP029116
miR-2c	gctcatcaattggttgtggct	tatcacagccattttgatgagc	chr2L: 37758085-37758193 [-]	AGAP029116
miR-7	tggaagactagtgattttgttgtt	caataaatctctcgtctttcta	chr2L: 8302899-8302985 [-]	AGAP005015
miR-8	catcttaccgggcagcattag	aatactgtcaggtaaagatg	chr3L: 38943045-38943130 [+]
miR-9a	tctttggttatctagctgta	ataaagctagcataccgaagtta	chr2L: 15089290-15089370 [-]
miR-9b	actttggtgattttagctgt	tatagctttatcaccaaaaacc	chr3R: 5887786-5887878 [-]	AGAP008118
miR-9c	tctttggtattctagctgta	taaagctttagtaccagaggt	chr3R: 5891167-5891256 [-]	AGAP008118
miR-10	caccctgtagatccgaatttgtt	caaattcggttctagagaggttt	chr2R: 59711765-59711866 [-]
miR-11	caagaacttggaactgtgatctgt	catcacagtctgagttcttg	chr2R: 13042022-13042111 [+]	AGAP001978
miR-12	tgagtattacatcaggtactg	tcagtacttgtgttatactct	chr2R: 37888037-37888153 [-]	AGAP003457
miR-13b	tcgtaaaaatggttgtgccgtg	tatcacagccattttgacgagtt	chr2L: 37757564-37757657 [-]	AGAP029116
miR-14	gggagcgagattaaggcttgct	tcagtctttttctctctcct	chr3R: 24898041-24898134 [+]
miR-31	tggcaagatgttggcatagcta	tagctattcaacttcttgtttat	chrX: 14375903-14376013 [+]
miR-33	gtgcattgtagttgcattgca	cagtacttctgcaatgcaaccc	chrX: 1256105-1255994 [-]	AGAP000076
miR-34	tggcagtgtggttagctggttg	cagccactatccgccctgccgtc	chr2R: 28232667-28232756 [-]
miR-79	gctttggcgctttagctgtatga	ataaagctagattaccaaagcat	chr3R: 5888298-5888391 [-]	AGAP008118
miR-87	ccagcctgaaatttgctaaacct	gtgagcaaatattcaggtgtgt	chrX: 261172-261271 [-]	AGAP000019
miR-92a	cggccggctcaagagcaaaatt	tattgcacttgtcccggcctat	chr2R: 39181115-39181203 [+]
miR-92b	aggacgtgacaggtgcattatttg	aattgcacttgtcccggcctgc	chr2R: 39200608-39200694 [+]
miR-100	aacccgtagatccgaacttgtg	aagaacggatatatgggattct	chr3R: 10274677-10274768 [-]
miR-124	ggtgttcactgtaggcctgtatg	taaggcacgcggtgaatgcca	chr3R: 29001980-29002062 [+]
miR-125	tccctgagaccctaacttgtga	acaagttttgatctccggtat	chr3R: 10270160-10270271 [-]
miR-133	agctggttgacatcgggtcaa	ttggtccccttcaaccagctgt	chr3R: 15075187-15075263 [-]
miR-137	acgcgtattcttgggttacta	tattgcttgagaatacacgtag	chr2L: 11039426-11039516 [+]
miR-184	ccttatcattctttcgccccgt	tggacggagaactgataaggg	chr3R: 42632357-42632438 [+]
miR-190	agatatgtttgatattcttggttg	cccaggaatcaaacatattatt	chr2L: 46755772-46755872 [-]	AGAP007474
miR-210	cagctgctgaccactgcacaaga	ttgtgcgtgtgacaacggcta	chrX: 21450335-21450414 [+]
miR-219	tgattgtccaaacgcaattcttg	agagttgtgactggacatccgt	chr2L: 21839672-21839758 [-]
miR-263a	aatggcactggaagaattcac	cgtgttctcttagtggcatacc	chr3R: 12395476-12395561 [+]
miR-263b	cttggcactgggagaattcac	gtggatcttttcgtgccatcgt	chr2L: 17784444-17784539 [+]
miR-275	cgcgctaagcaggaaccgggact	tcaggtacctgaagtagcgcg	chr3R: 38377342-38377436 [+]
miR-276	agcgaggtatagagttcctacg	taggaacttcataccgtgctct	chr2L: 18991754-18991845 [+]
miR-277	cgtgtcagaggtgcatttaca	taaatgcactatctggtacgaca	chr2R: 28234523-28234612 [-]
miR-278	acggacgatagtcttcaacgacc	tcggtgggactttcgtccgttt	chr3L: 34112621-34112703 [-]
miR-279	aatgggtgtgaatctagtgatttc	tgactagatccacactcattaa	chr2R: 55573327-55573415 [-]	AGAP004392
miR-281	aaagagagctatccgtcgac	ctgtcatggaattgctctcttta	chr2L: 17362421-17362522 [-]
miR-282	tagcctcttctaggctttgtct	acatagcctgtcagaggttag	chr2L: 17496155-17496247 [-]
miR-283	aaatatcagctggtaattct	cgggatttcagctgatatcca	chr2R: 37890034-37890125 [-]	AGAP003457
miR-285	actggcttcctatcggtgcttag	tagcaccattcgaaatcagtac	chr3L: 39242638-39242747 [+]
miR-286	cgattgtcggactagtcgctg	tgactagaccgaacactcgcgt	chr3R: 43009395-43009490 [-]
miR-286b	gcgaatgtcggagtagtcgct	tgactagaccgaacactcgtatcc	chr2L: 3537482-3537547 [-]
miR-305	attgtacttcatcaggtgct	cggcacatgttggagtacactc	chr3R: 38386246-38386335 [+]
miR-306	tcaggtactggatgactctc	tgagggccttctggtacctacc	chr3R: 5888600-5888675 [-]	AGAP008118
miR-307	actcactcaacctgggtgtgat	tcacaacctccttgagtgagc	chr3L: 34537912-34538009 [+]	AGAP011870
miR-308	cgcagtatatccctgtgagtttg	aatcacaggagtatactgtgaga	chr3L: 40899904-40900003 [-]
miR-309	cgacaaactccgtccagaggg	tcactgggcaaagtttgtcgca	chr3R: 43008711-43008784 [-]
miR-315	ttttgattgttgctcagaaagcc	ctttcgggcagtaatcaaagtc	chr2R: 33703164-33703239 [+]
miR-317	tgggatactccttgtgctcgct	tgaacacatctggtggtatctcagt	chr2R: 28251997-28252086 [-]
miR-375	cttaagccacgcgtacagaaact	tttgttcgtttggctcgagtta	chr3R: 51640560-51640668 [-]
miR-927	tttagaattcctacgctttacc	caaagcgtttggattctgaaac	chrX: 18737368-18737460 [+]	AGAP000974
miR-929	aaattgactctagtagggagt	ctccctaacggagtcagattg	chr2R: 38819434-38819522 [-]	AGAP003509
miR-932	tcaattccgtagtgcattgcagt	tgcaagcattgtgggagtgaa	chr2R: 15199812-15199921 [+]	AGAP002090
miR-957	gttagttttgggcgggttttagt	tgaaaccgtccaaaactgaggc	chr3L: 14911228-14911321 [+]
miR-965-1	aggggaatgctgtacactcta	taagcgtatagcttttcccatt	chr3R: 11096169-11096272 [+]
miR-965-2	aggggaatgctgtacactcta	taagcgtatagcttttcccatt	chr3R: 11101688-11101791 [+]
miR-970	agccagcgtttgttttatttggta	tcataagacacacgcggctat	chrX: 112022-112119 [-]	AGAP000009
miR-980	cggtcgttcattaggtcatctagc	tagctgcctagtgaagggca	chr2R: 21985976-21985863 [-]
miR-981	cgggtttcgctggctaacgtgtt	ttcgttgtcgacgaaacctg	chrX: 1228287-1228381 [+]
miR-988	gtgtgttttgtgacaatgagat	ccccttgttgcaaacctcacgc	chr2L: 39359054-39359155 [+]	AGAP006885
miR-989	cgccgctacgttgctttcacttg	tgtgatgtgacgtagtggta	chr3L: 2905395-2905525 [+]
miR-993	taccctgtagttccgggctttt	gaagctcgtttctatagaggtatct	chr2R: 59284604-59284723 [-]
miR-996	gcgAgcatgttttctagtacacg	tgactagattacatgctcgt	chr2R: 55572842-55572910 [-]	AGAP004392
miR-998	gctgaactctcgtgggtctgc	tagcaccatgagattcagctc	chr2R: 13042382-13042491 [+]	AGAP001978
miR-1000	atattgtcctgtcacagcagt	tactgttgtttcgggacatttcc	chr2R: 13241765-13241857 [+]
miR-1174	gtgggtattttagatcatcgaca	tcagatctacttcatacccatga	chr2R: 9129499-9129675 [+]
miR-1175	taagtggagtagtggtctcatcgc	tgagattctacttctccgactta	chr2R: 9129786-9129865 [+]
miR-1889	caatctcaaattgtaatagtgtgt	acacattacagattgggatta	chr2R: 37888789-37888919 [-]	AGAP003457
miR-1890	agagctaattggagtatttcttg	tgaaatctttgattaggtctgg	chr3R: 21181082-21181177 [-]
miR-1891	ttgaggagttaatttgcgtgtt	acacgtccattaactctggta	chr3R: 5819038-5819138 [-]
miR-2796	aggggtttctttcggcctccag	gtaggccggcggaaactacttgc	chr2R: 22427284-22427343 [+]	AGAP002529
miR-2944a-1	gaaggaacttctgctgtgatct	atcacagtagttgtactttaa	chr3R: 43008954-43008843 [-]
miR-2944a-2	gaaggaacttctgctgtgatct	tatcacagtagttgtactttaa	chr2L: 3537080-3537136 [-]
miR-2944b	gaaggaactcccggtgtgatatg	tatcacagcggtagttacctga	chr3R: 43009147-43009035 [-]
miR-2945	agcgagtctgcactctggaataac	tgactagaggcagactcgtttgg	chr3R: 10314422-10314311 [-]	AGAP008397
miR-10355	cattaccgatggatccttaccg	agtaagggttttctgtaatgca	chrX: 1723972-1724033 [+]
miR-10365	attagaatgtggaatctgttttt	aaaagttttcatattcttgcgg	chr3L: 17216221-17216288 [+]
miR-10366a-1	cattgaaatcggctggggtagc	aatcaccggctttttcaatcaa	chrX: 15153636-15153695 [-]
miR-10366a-2	tcattgaaatcggctggggtag	aatcaccggctttttcaatcaa	chrX: 15180793-15180853 [-]
miR-10366b	attgaaatcggctatgatagct	caatcatcgccctttttaatg	chrX: 15128214-15128270 [-]
miR-10367	tagggtattgaacagatttgtt	aacactctgtttatgctctct	chr2R: 34624575-34624634 [-]
miR-10368	tgcagcaatctaggcagcgttct	acacgaccctgattgctgtagt	chrX: 7416770-7416834 [-]
miR-10369	ttcattaaaaggggctacaa	tagtgacactttttaatgaaat	chrX: 15179879-15179934 [-]
miR-10370-1	ctcattaaaatggacaacgatagc	taatgtccatggttaatgaaat	chrX: 15180515-15180578 [-]
miR-10370-2	ctcattaaaatggacaacgatagt	taatgtccatggttaatgaaat	chrX: 15153352-15153415 [-]
miR-10372a	attgaaataggatactaaagcg	ccttagttaccctttttcaatga	chrX: 15152858-15152916 [-]
miR-10372b	attgaaaaaggcaacagaagcg	cctatgttgcatttttcaatgt	chrX: 15179292-15179349 [-]
miR-10373	aatacgtctagctttggtagcttct	gagagaaacatttgtgaaggcgtat	chr3L: 4587583-4587658 [+]
miR-10376	aaggaatcgctcgacgacgtgc	actcgatcgatcgaatccatcc	chr2R: 2995184-2995258 [+]	AGAP001322
miR-10377a	ggagttggagagtggcttaac	taaagccattcctcaattcta	chr3R: 19372881-19372972 [-]	AGAP008843
miR-10377b	ggagttggaaattgacgtaacc	tcatcatcagtttctaattcca	chr3R: 19372525-19372629 [-]	AGAP008843
miR-10378	cgtggtactcttgtggtaagg	tctatcatttgagtaccatga	chr2R: 18852626-18852723 [-]
miR-10379	actgttttgttcgttgttctca	tggaagaacgaacaagactgta	chrX: 7417600-7417679 [-]
miR-10380	gtgagtaatgtgttgctgaatgtttga	aattctcaacctcacattacaga	chrX: 23965282-23965364 [+]	AGAP001091
miR-10381	gtgagtaaacgcgcaaagcgga		chr3R: 42055853-42055956 [+]	AGAP009738
miR-12414		aagacgctggttctcttcacaca	chr2R: 36376058-36376154 [-]	AGAP003349
miR-12416		tgacgggtttggtctctcca	chrX: 23502516-23502590 [+]
miR-12417	tagtcgttttctgctttgcggtt		chr2L: 48562288-48562365 [+]
miR-12418		tgttcgatcgttactgtcatat	chr3R: 44916363-44916443 [-]
miR-iab-4	acgtatactgaatgtatcctga	tataccttcagtatacgtaact	chr2R: 60297556-60297639 [+]

## Sheet: Aedes orthologs
Dataset S1. Master List of Anopheles gambiae miRNAs (numerical order)
miRNAs Aedes orthologs List
miRNA name	5p	3p	genome local	intragenic miRNA
miR-71	agaaagacatgggtagtgagata	tctcactaccttgtctttcatg	2L: 37759568 -37759477 [-]	AGAP029116
miR-193	tgggattttgtggaccagaag	tgctggcctactaagtcccaac	3L: 30135933-30136026 [+]	AGAP011622
miR-252	ctaagtactagtgccgcaggag	cctgctgcccaagtgcttatcga	2R: 52693390-52693280 [-]
miR-316	tgtcttttcctgcttactgccg	ttcgacagcaatcagaaaaaga	3L: 41240255-41240178 [-]
miR-999	acgcggtcatgcagtctaatatt	tgttaactgtaagactgtgtct	2R: 8265271-8265160 [-]	AGAP001683
miR-2765	tggtaactccaccaccgttggct	caatgggagctggagtttccg	2R: 36338005-36337958 [-], uNKN 36488050-36488046 [-]
miR-2940	tggtttatctagtctgtcgaaac	gtcgacagagagataaatcact	x: 2840551-2840440 [-]
miR-2942	gattcgctgtggtctcgaacgtacc	tattcgagaccttcacgagttaa	3L: 39686838-39686949 [+]

## Sheet: Levashina E and Zhu J Ag LIST
Dataset S1. Master List of Anopheles gambiae miRNAs (numerical order)
EL and JZ Ag list
miRNA name	mature sequence	genome local	intragenic miRNA
miR-N1-3p	ctcatcaattggttgtggctatg	2L: 37758184 -37758162 [-]	AGAP029116
miR-N3-3p	tgacttgtctgcctgagcaagggg	unknown 30034602-30034492 [-]
miR-N12-3p	tgcattcagtggggcggtcgtg	2R: 7197967-7197857 [-]
miR-PN5-5p	tagtacgaatacgtacgaggga	3R 507015-506903 [-]	AGAP007767
miR-PN6-3p	tgtggtggcacactttgacaac	2L: 9916570-9916683 [+]	AGAP005091
miR-PN8-3p	ttatacttcctgcttcaccgat	3R: 19372245-19372134 [-]	AGAP008843
miR-PN12-3p	ttagattcccagatcgtcagat	x: 10416017-10416038 [+]	AGAP000585
miR-PN13-5p	taagtgcaaatcgttgtagtcggtt	3L: 31252187- 31252163 [-]
miR-PN16-5p	atggggtttgacctgctgggc	3L: 34333697-34333717 [+]	AGAP011870
miR-PN17-3p	cgggctgttgcagcaggtgcct	2R: 57684067-57684088 [+]	AGAP004572
miR-PN18-5p	gtagtccggagtggagtc	2L: 42944574-42944591 [+]
miR-PN19-5p	aacgagtttcccgatacgactg	3L: 41925835-41925946 [+]	AGAP012424
miR-PN26-5p	ttgcgagaggacctataatgact	3R: 17944318-17944206 [-]	AGAP008794
miR-PN27-3p	ttttggaacacaagctcggcaggcc	2L: 5507616-5507640 [+]
miR-PN29-3p	aaccgacagatcattggccaga	x: 6133175-6133064 [-]
miR-PN30-5p	aggattcgtagtgctactgtgcaga	3R: 52847702-52847814 [+]
miR-PN32-1 5p	ttggtctgattgcctacactggctt	2L: 6294169-6294193 [+]
miR-PN32-2 5p	ttggtctgattgcctacactggctt	3L 9986811- 9986787 [-]
miR-PN33-5p	taggatctattgacattgcagcct	2L: 5268925-5268948 [+]
miR-PN34-3p	ctcgctggctgtccgcaaact	3R: 10043747-10043637 [-]
miR-PN35-3p	tgagagaacgaaagcattcctt	2R: 49467496-49467606 [+]	AGAP004071

## Sheet: Novel from miRDeep2
Dataset S1. Master List of Anopheles gambiae miRNAs (numerical order)
novel miRNAs from miRDeep2
miRNA name	hairpin sequence	5p	3p	genome loci	kcal/mol	intragenic miRNA
miR-2L_14200	gttatcagccgcaaaacccacaaaccgccgatgcgctgcgggtgtgttgcttgagcagtgataaaaaagcaacagcccaacggttgcttcggcgagcatgggaggtaaaacaa	atgcgctgcgggtgtgttgct	caacagcccaacggttgcttcggc	2L: 27005652-27005540 [-]	-38.5	AGAP006121
miR-2L_14684	gagcgcacgaaattacagaaattacgattggcacgctggttcgttcgtttgcggtaaatcaagaatagcaaacgacgaaagctgtgagctctttgtggtgtcctccgtggtg	ggcacgctggttcgttcgtttgc	aacgacgaaagctgtgagctct	2L: 43745856-43745745 [-]	-30
miR-3L_35860	cggtaagtacctcgggaacctgggggtgtagcgagcgatcggggtgtattgttccctcactgtcaactctcgtcgtttttgctcaccttgcaggcacgtccagcgtggcccgt	tgggggtgtagcgagcgatcggg	tcgtcgtttttgctcaccttgcag	3L: 6390066-6390178 [+]	-40.2	AGAP028613
miR-3R_8209	ggctaacgccatcagaatccacggatggaaatagtctaatccagaacgtgatggactgccactagaatggtttaggatgtttccttccgttttccgaaaaagtatctctct	acggatggaaatagtctaatc	tttaggatgtttccttccgttt	3R: 19368440-19368330 [-]	-31.2	AGAP008843
miR-3R_8221	gttcacaggtccgtcgttcgtgtgaggaatgccttaatcggatggatgatgcatctgccgccctgcaggttggtggatagaatctcattaaggtacacctcaccgttcgtaa	gtgtgaggaatgccttaatcgga	tcattaaggtacacctcaccgt	3R: 19376051-19375940 [-]	-38.4	AGAP008843
miR-X_39763	ggtcgagcgtcttctttcaactgcaagtggatgcggcttttagtgcataaccccgtaccgctaaaaactgtcggaaatttagcttggagacccttgatgtagccgcttgacga	caactgcaagtggatgcggct	tcggaaatttagcttggagaccct	x: 17435423-17435535 [+], 23765214-23765102 [-]	-31.4
miR-X_41652	ggaccgcgatccgtccctttcactgtttgtcggtggtggtgctattgcgcgtgtggcagcgaaaaccctctcagcatcccgacagacagacggaggaagcagaaacctgctg	actgtttgtcggtggtggtgc	tcagcatcccgacagacagacg	x: 1032358-1032247 [-]	-42.3
